# Supplementary material
Source: Springer Nature journal article supplement (https://www.springermedizin.de/resource/supplementary/12879_2012_2507_MOESM2_ESM.pdf/9444722)
Supplement: MOESM2 [file 9444722]

5171 records identified through database searching (357 from CINAHL plus, 1285 from EMBASE, 556 from Global Health, 1061 from Medline, 1912 from Scopus)

2461 records after duplicates removed

2461 records screened

2159 records excluded after title-abstract selection based on eligibility criteria

302 full-text articles assessed for eligibility

208 full-text articles excluded based on eligibility criteria

96 of studies included in qualitative synthesis

2 additional records identified by reference searching
